# Supplementary material for: Thermo, pH and reduction responsive coaggregates comprising AB2C2 star terpolymers for multi-triggered release of doxorubicin
Source: Royal Society of Chemistry journal article supplement (doi:10.1039/c3py01767b), 2014-01-01
Supplement: c3py01767b1.pdf [file c3py01767b1.pdf]

## Supporting Information

### Thermo, pH and reduction responsive coaggregates comprising AB<sub>2</sub>C<sub>2</sub> star terpolymers for multi-triggered release of doxorubicin

Ke Miao, Huanhuan Liu and Youliang Zhao\*

Jiangsu Key Laboratory of Advanced Functional Polymer Design and Application, Department of Polymer Science and Engineering, College of Chemistry, Chemical Engineering and Materials Science, Soochow University, Suzhou 215123, China

**Table S1** Dependence of apparent drug-release rate ( $K$ ), cumulative release (CR) and increment of cumulative release (ICR) at 48 h on external stimuli during in vitro DOX release from various aggregates

| Aggregates | stimuli | T (°C) | pH  | DTT  | $K$ (h <sup>-1</sup> ) | CR (%) | ICR(%) |
|------------|---------|--------|-----|------|------------------------|--------|--------|
| S1         | dual    | 25     | 7.4 | none | 0.0291                 | 19.2   | 0      |
| S1         | dual    | 25     | 7.4 | yes  | 0.0705                 | 41.4   | 116    |
| S1         | dual    | 37     | 7.4 | none | 0.115                  | 37.0   | 93     |
| S1         | dual    | 37     | 7.4 | yes  | 0.161                  | 61.1   | 218    |
| S3         | dual    | 37     | 7.4 | none | 0.065                  | 26.7   | 0      |
| S3         | dual    | 37     | 7.4 | yes  | 0.137                  | 43.0   | 61     |
| S3         | dual    | 37     | 5.3 | none | 0.119                  | 38.4   | 44     |
| S3         | dual    | 37     | 5.3 | yes  | 0.215                  | 63.1   | 136    |
| S1+S3      | triple  | 25     | 7.4 | none | 0.0261                 | 18.3   | 0      |
| S1+S3      | triple  | 25     | 7.4 | yes  | 0.0393                 | 36.8   | 101    |
| S1+S3      | triple  | 25     | 5.3 | none | 0.0326                 | 35.0   | 91     |
| S1+S3      | triple  | 25     | 5.3 | yes  | 0.0496                 | 42.0   | 130    |
| S1+S3      | triple  | 37     | 7.4 | none | 0.0618                 | 24.1   | 32     |
| S1+S3      | triple  | 37     | 7.4 | yes  | 0.135                  | 42.9   | 134    |
| S1+S3      | triple  | 37     | 5.3 | none | 0.0837                 | 33.0   | 80     |
| S1+S3      | triple  | 37     | 5.3 | yes  | 0.177                  | 57.1   | 212    |

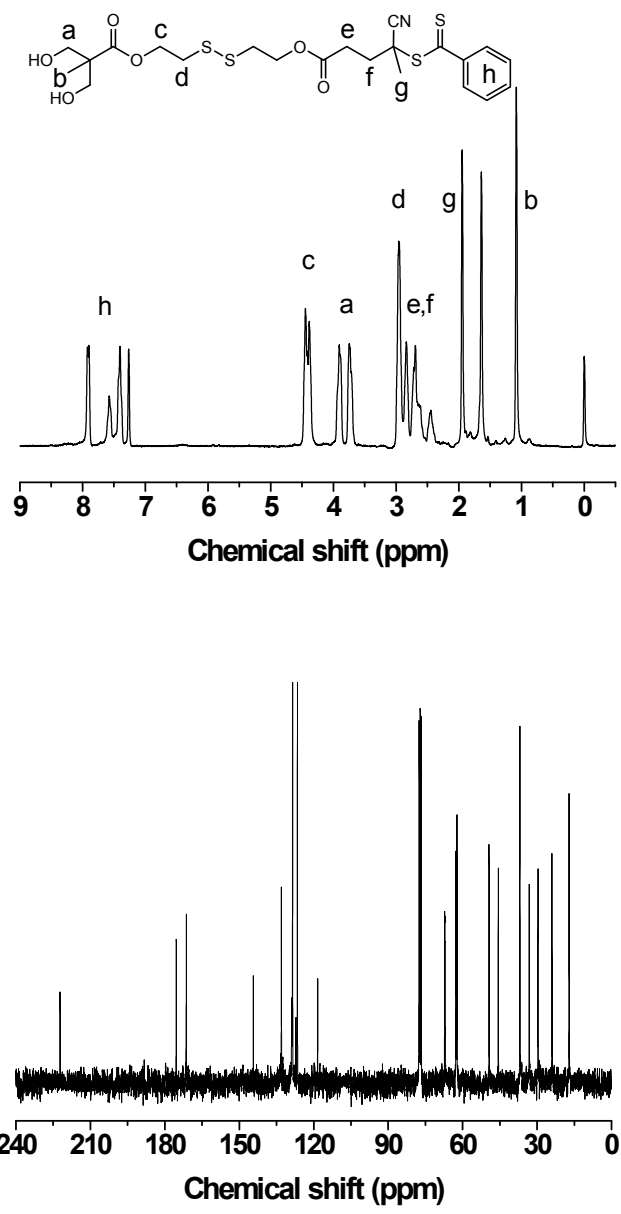

**Fig. S1**  $^1\text{H}$  (top) and  $^{13}\text{C}$  (bottom) NMR spectra of DCP.

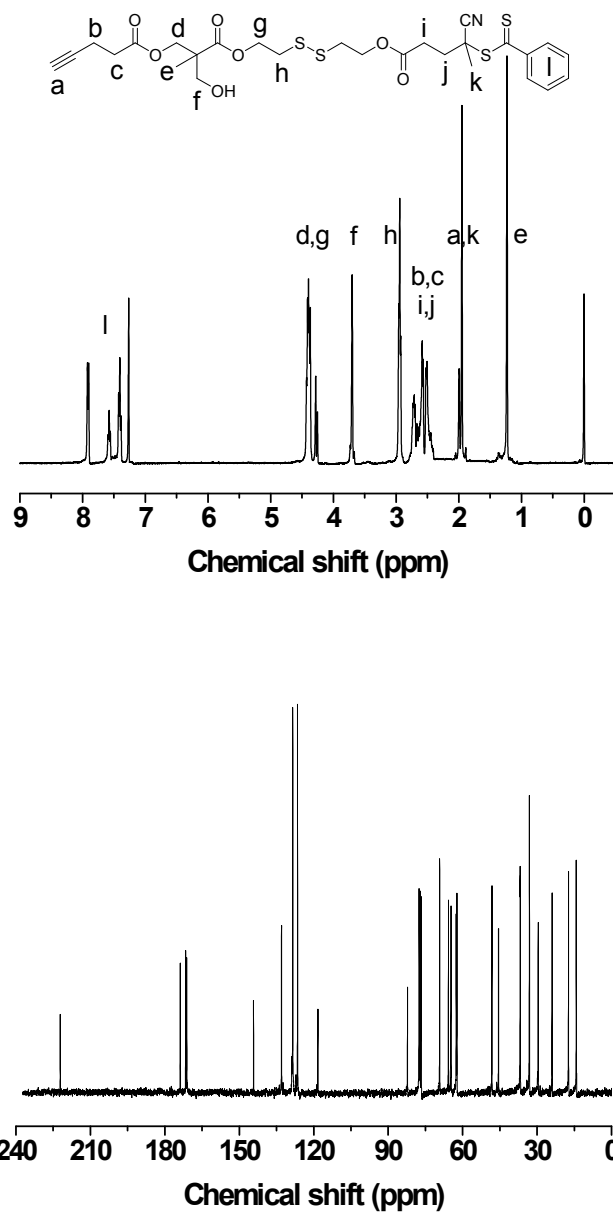

**Fig. S2**  $^1\text{H}$  (top) and  $^{13}\text{C}$  (bottom) NMR spectra of HCP.

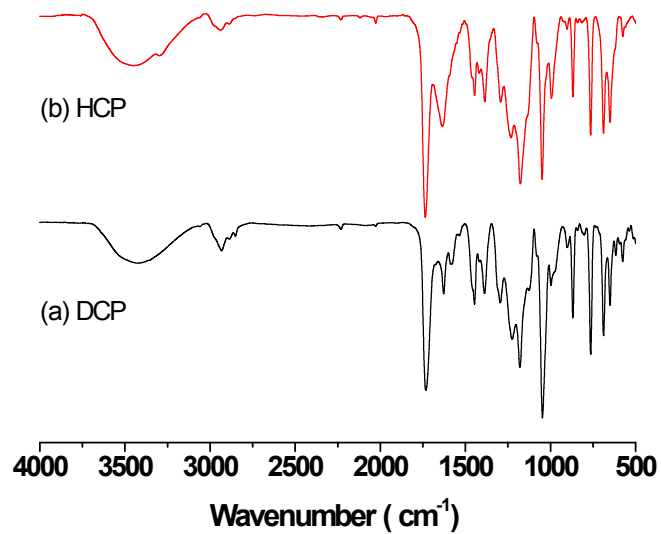

**Fig. S3** IR spectra of trifunctional agents DCP and HCP.

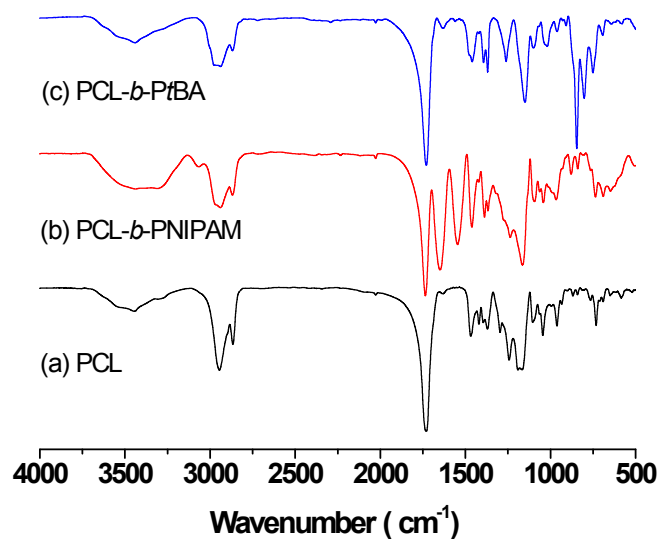

**Fig. S4** IR spectra of alkyne-functionalized PCL (a), PCL-*b*-PNIPAM (b) and PCL-*b*-PtBA (c).

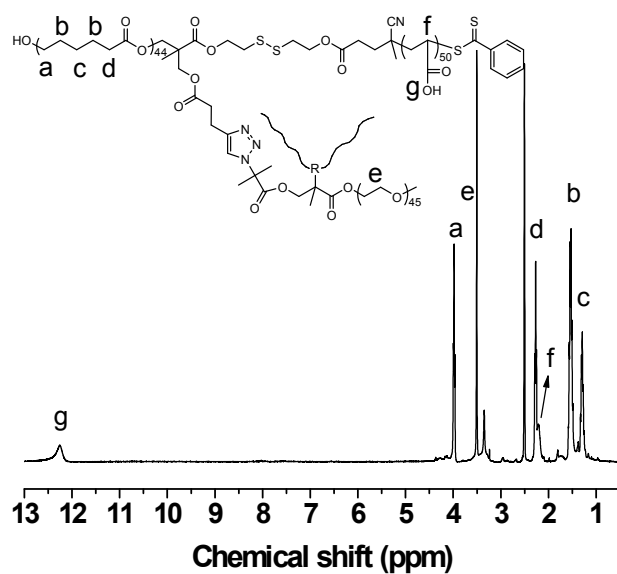

**Fig S5.**  $^1\text{H}$  NMR spectrum of  $\text{PEG}(\text{PCL})_2(\text{PAA})_2$  star copolymer in  $\text{DMSO-}d_6$ .

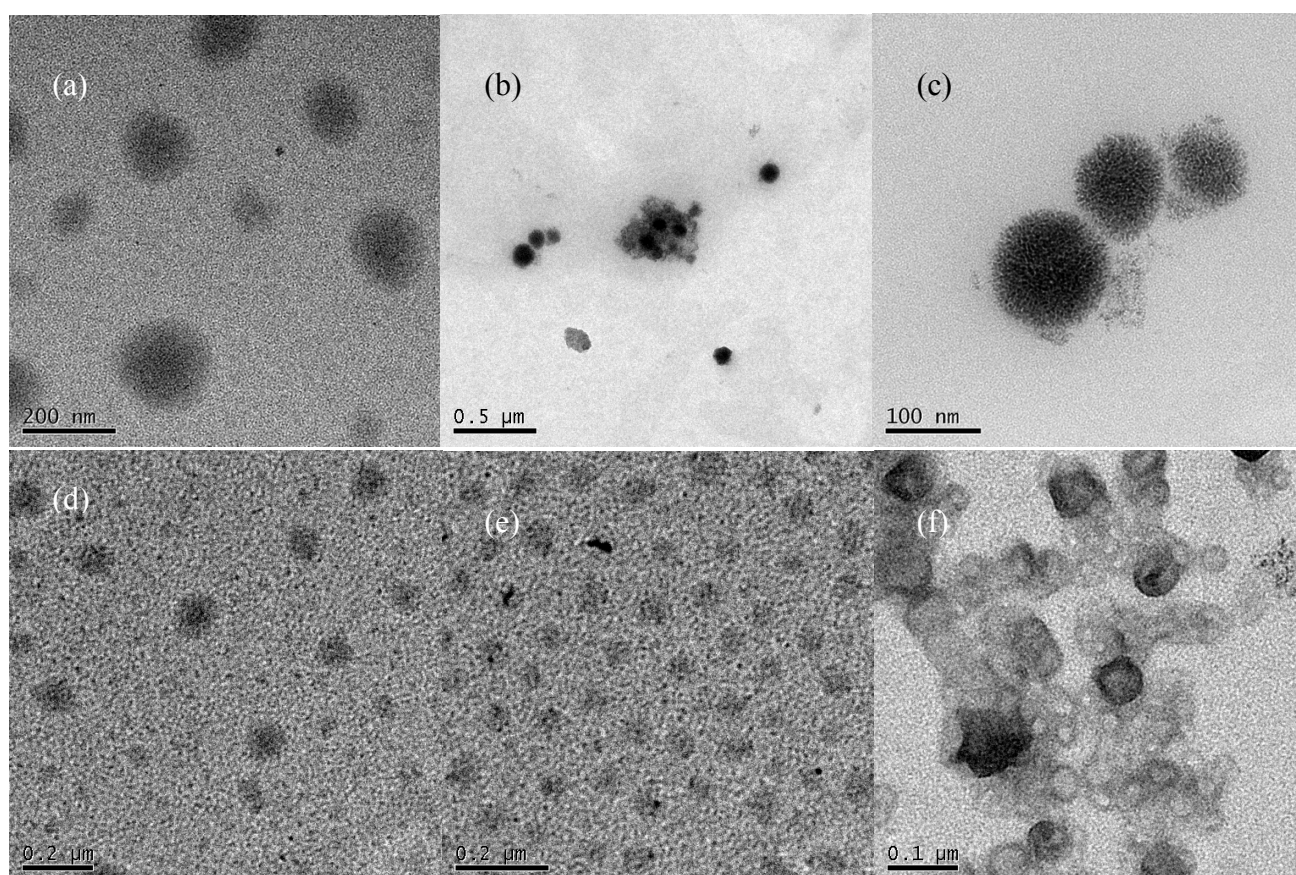

**Fig S6.** TEM images of copolymer aggregates formed by  $\text{PEG}(\text{PCL})_2(\text{PNIPAM})_2$  (a,  $T = 25\text{ }^\circ\text{C}$ ; b and c,  $T = 37\text{ }^\circ\text{C}$ ),  $\text{PEG}(\text{PCL})_2(\text{PAA})_2$  (d,  $T = 37\text{ }^\circ\text{C}$ ) and their mixtures according to equimolar ratio (e,  $T = 25\text{ }^\circ\text{C}$ ; f,  $T = 37\text{ }^\circ\text{C}$ ) in PBS solution with pH 7.4 ( $c = 0.50\text{ mg mL}^{-1}$ ).

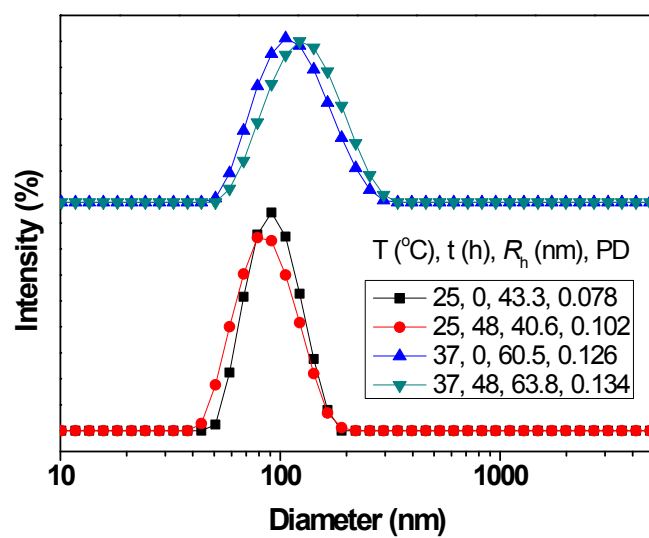

**Fig. S7** DLS plots of S1/S3 coaggregates ( $c = 0.50 \text{ mg mL}^{-1}$ ) in PBS solution (pH 7.4, 50 mM) at 25 or 37 °C for different time periods ( $t = 0$  and 48 h).
